# Supplementary material for: Sustainable Production and Characteristics of Dried Fermented Vegetables
Source: MDPI journal article supplement (doi:10.3390/fermentation8110659), 2022-11-21
Supplement: s1 [file s1]

# Sustainable Production and Characteristics of Dried Fermented Vegetables

Emilia Janiszewska-Turak <sup>1,\*</sup>, Katarzyna Rybak <sup>1</sup>, Katarzyna Pobiega <sup>2</sup>, Anna Nikodem <sup>3</sup>  
and Anna Gramza-Michałowska <sup>4,\*</sup>

<sup>1</sup> Department of Food Engineering and Process Management, Institute of Food Sciences, Warsaw University of Life Sciences—SGGW, 02-787 Warsaw, Poland

<sup>2</sup> Department of Food Biotechnology and Microbiology, Institute of Food Sciences, Warsaw University of Life Sciences—SGGW, 02-787 Warsaw, Poland

<sup>3</sup> Department of Mechanics, Materials and Biomedical Engineering, Wrocław University of Science and Technology, 7/9 Ignacego Łukasiewicza Street, 50-371 Wrocław, Poland

<sup>4</sup> Department of Gastronomy Science and Functional Foods, Faculty of Food Science and Nutrition, Poznań University of Life Sciences, Wojska Polskiego 31, 60-624 Poznań, Poland

\* Correspondence: emilia\_janiszewska\_turak@sggw.edu.pl (E.J.-T.); anna.gramza@up.poznan.pl (A.G.-M.); Tel.: +48-22-593-7366 (E.J.-T.); +48-61-848-7327 (A.G.-M.)

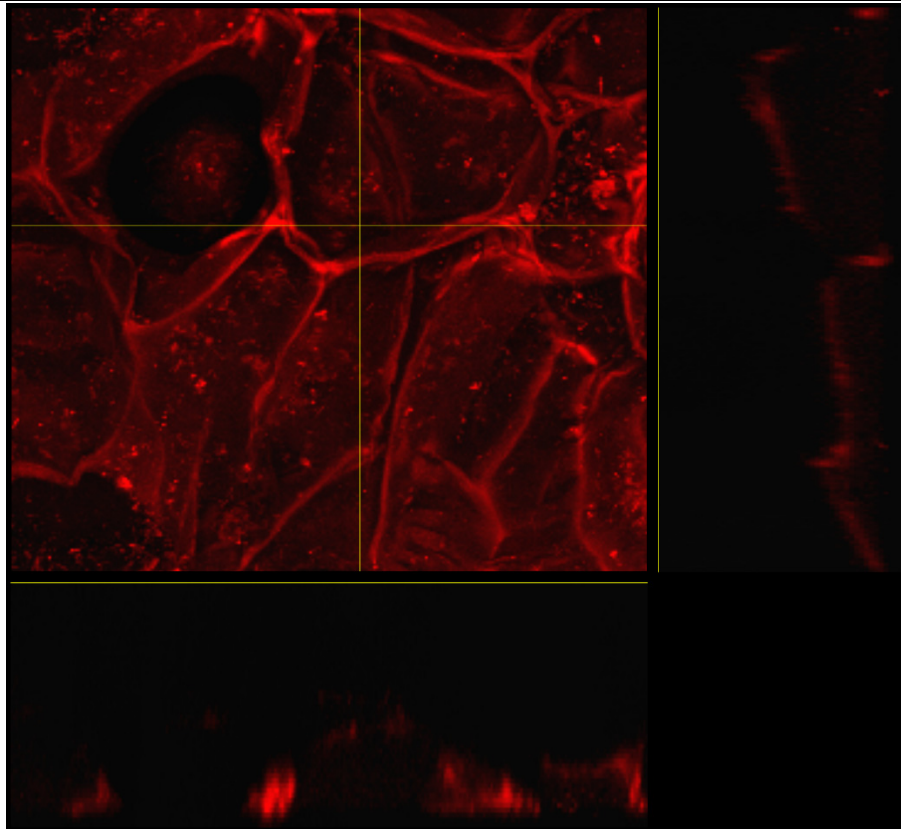

(a)

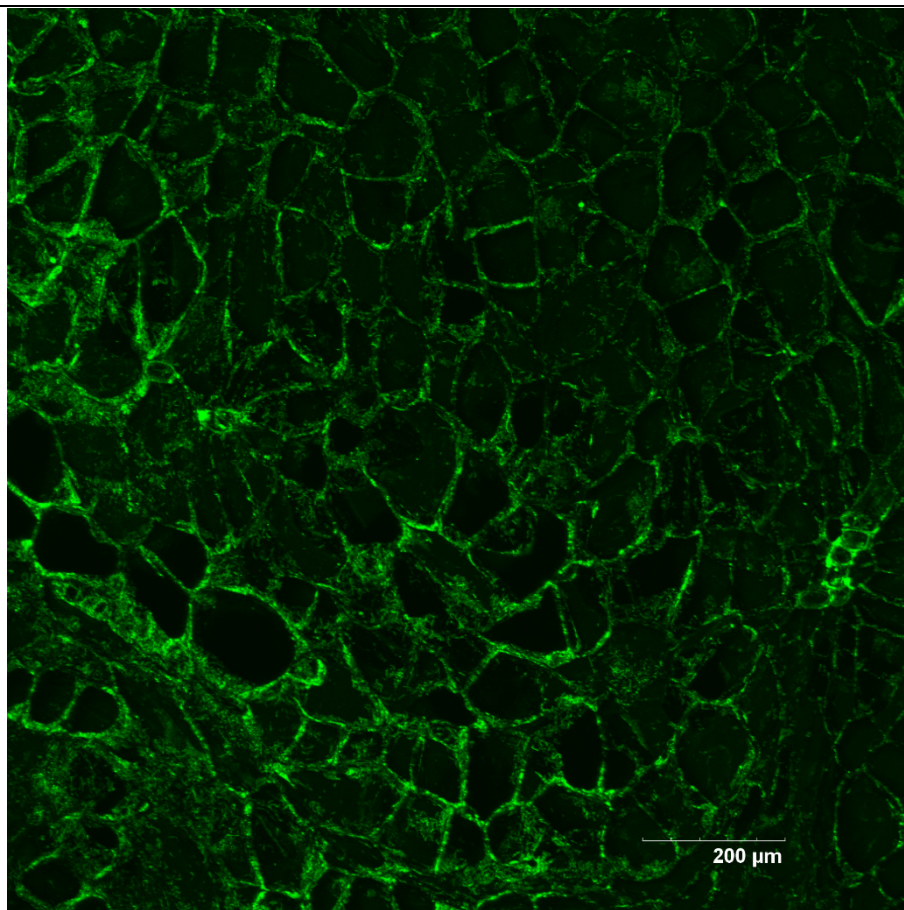

(b)

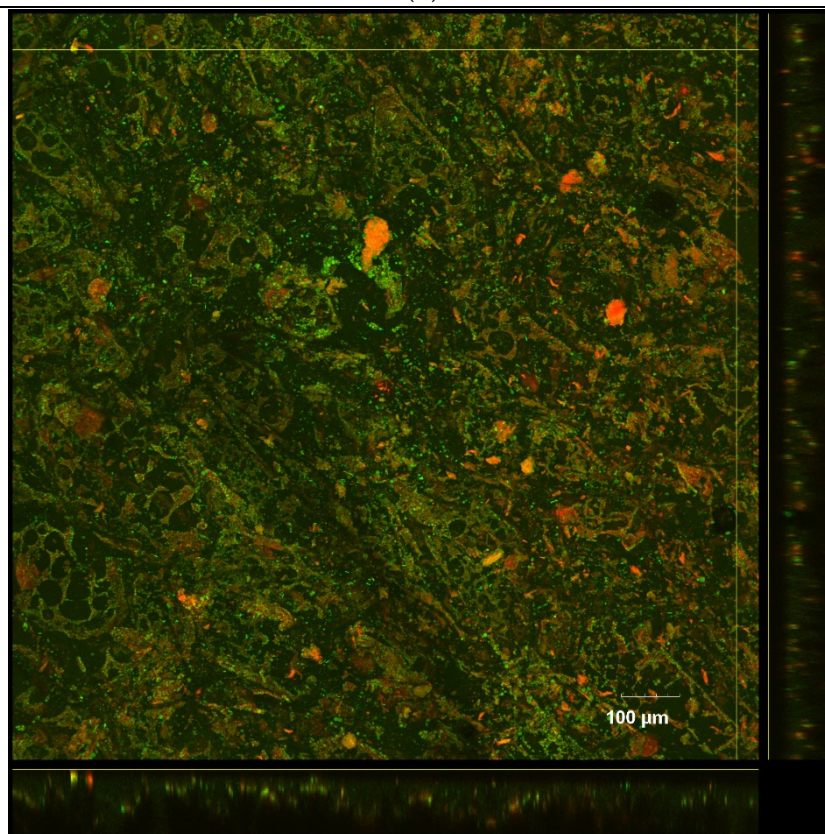

(c)

**Figure S1.** Structure of raw and fermented vegetables (confocal microscope): (a) fermented beetroot; (b) fermented carrot; (c) fermented red bell pepper.
