# Supplementary material for: Sustainable Production and Characteristics of Dried Fermented Vegetables
Source: MDPI journal article supplement (doi:10.3390/fermentation8110659), 2022-11-21
Supplement: s1 [file s1]

Archive with 1 entries (1 files):
- fermentation-2001826-supplementary.pdf
